# Supplementary material for: Toxicokinetics of Deoxynivalenol in Dezhou Male Donkeys after Oral Administration
Source: MDPI journal article supplement (doi:10.3390/toxins15070426), 2023-06-30
Supplement: s1 [file s1]

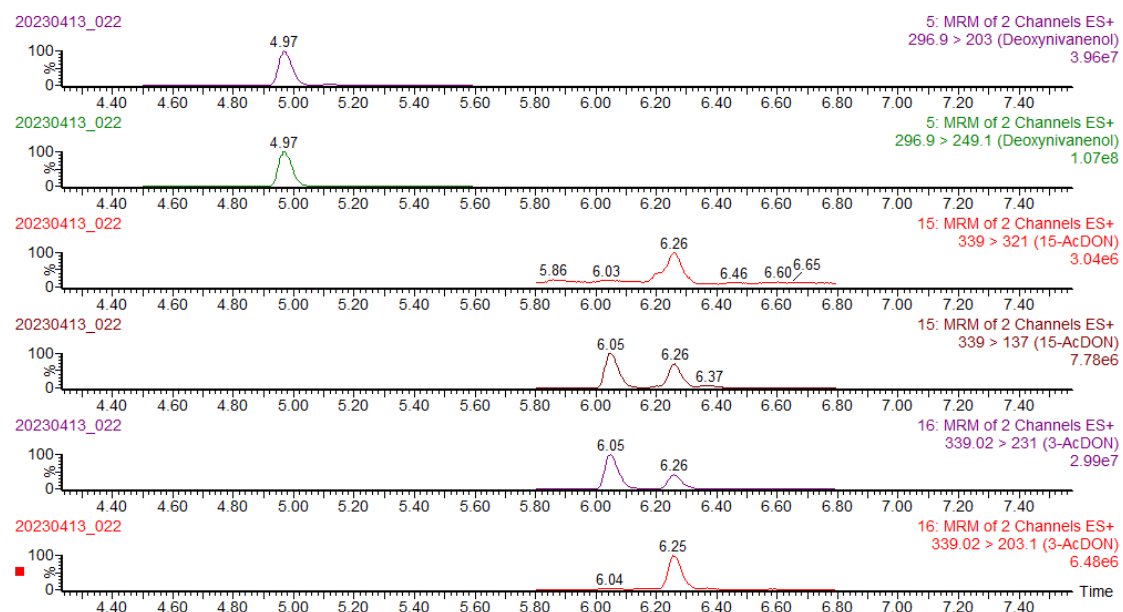

**Figure S1.** MRM of deoxynivalenol (DON), 15-Acetyldeoxynivalenol (15ADON) and 3-Acetyldeoxynivalenol (3ADON) in the moldy corn.
